# Supplementary material for: How axon and dendrite branching are guided by time, energy, and spatial constraints
Source: Springer Nature journal article supplement (doi:10.1038/s41598-022-24813-2), 2022-12-02
Supplement: MOESM1 [file 41598_2022_24813_MOESM1_ESM.pdf]

## Supplementary Information

### How Axon and Dendrite Branching Are Governed by Time, Energy, and Spatial Constraints

Paheli Desai-Chowdhry<sup>1\*</sup>, Alexander B. Brummer<sup>1,2</sup> ✉, Van M. Savage<sup>1,2,3</sup>

**1** Department of Computational Medicine, University of California Los Angeles, Los Angeles, California, United States of America

**2** Department of Ecology and Evolutionary Biology, University of California Los Angeles, Los Angeles, California, United States of America

**3** Santa Fe Institute, Santa Fe, New Mexico, United States of America

### Text S1. Scaling Ratio Calculation

We use the method of Lagrange multipliers to solve for the values of the scaling ratios for radius and length,  $\frac{r_{k+1}}{r_k}$  and  $\frac{l_{k+1}}{l_k}$ , that minimize the objective function. This is carried out by setting the derivatives of these functions - with respect to radius and length - equal to 0 and solving for the Lagrange multipliers. These values are assumed to be constant, so we solve for the scaling ratios by setting the ratio of the multiplier expressions at successive branching generations equal to 1.

Below, we show a sample calculation of the method of Lagrange multipliers for one of the cases. We will consider the objective function P - the function minimizing power with fixed volume, mass, and space filling - for our sample calculation. Below is the equation for this function:

$$P = \sum_{k=0}^N \frac{l_k}{r_k^2 n^k} + \lambda \sum_{k=0}^N n^k r_k^2 l_k + \lambda_m m_c + \sum_{k=0}^N \lambda_k n^k l_k^d \quad (\text{S1.1})$$

#### Radius Scaling Ratio Calculation

To find the radius scaling ratio, we will minimize P with respect to  $r_k$ , at an arbitrary level k, and set the result equal to 0. Thus, we can find a formula for a Lagrange multiplier and derive the scaling law.

$$\frac{\partial P}{\partial r_k} = \frac{-2l_k}{n^k r_k^3} + 2\lambda n^k r_k l_k = 0 \quad (\text{S1.2})$$

Solving for the Lagrange multiplier, we have

$$\lambda = \frac{1}{n^{2k} r_k^4} \quad (\text{S1.3})$$

Since this is a constant, the denominator must be constant across levels.

$$\frac{n^{2(k+1)} r_{k+1}^4}{n^{2k} r_k^4} = 1 \quad (\text{S1.4})$$

Thus, we can solve for the scaling ratio

$$\frac{r_{k+1}}{r_k} = (n^{-2})^{1/4} = n^{-1/2} \quad (\text{S1.5})$$

### Length Scaling Ratio Calculation

To find the length scaling ratio, we will minimize  $P$  with respect to  $l_k$ , at an arbitrary level  $k$ , and set the result equal to 0. Thus, we can find a formula for a Lagrange multiplier, using the formula above, and derive the scaling law.

$$\frac{\partial P}{\partial l_k} = \frac{1}{n^k r_k^2} + \lambda n^k r_k^2 + d \lambda_k n^k l_k^{d-1} = 0 \quad (\text{S1.6})$$

Solving for the Lagrange multiplier, we have

$$\lambda_k = \frac{-\frac{1}{n^k r_k^2} - \lambda n^k r_k^2}{d n^k l_k^{d-1}} \quad (\text{S1.7})$$

Substituting  $\lambda$ , as calculated before, we can simplify the expression for this multiplier as follows

$$\lambda_k = \frac{-\frac{1}{n^k r_k^2} - \frac{1}{n^k r_k^2}}{d n^k l_k^{d-1}} = -\frac{2}{d n^{2k} l_k^{d-1} r_k^2} \quad (\text{S1.8})$$

Since this is a constant, the denominator must be constant across levels, so

$$\frac{n^{2(k+1)} l_{k+1}^{d-1} r_{k+1}^2}{n^{2k} l_k^{d-1} r_k^2} = 1 \quad (\text{S1.9})$$

Thus, substituting in the scaling ratio for radius, we can solve for the scaling ratio for length

$$\left(\frac{l_{k+1}}{l_k}\right)^{d-1} = n^{-2} \left(\frac{r_{k+1}}{r_k}\right)^{-2} \quad (\text{S1.10})$$

$$\left(\frac{l_{k+1}}{l_k}\right)^{d-1} = n^{-2} \left(n^{-1/2}\right)^{-2} = n^{-1} \quad (\text{S1.11})$$

For the case where the dimension of space filling,  $d$ , is equal to 3, we have

$$\frac{l_{k+1}}{l_k} = n^{-1/2} \quad (\text{S1.12})$$

This method is repeated to solve for the theoretical predictions of scaling ratios for radius and length for the other objective functions.

## Text S2. Allometry Calculation

We can use the objective function  $P^*$  - the function minimizing power with fixed time delay, size, and space filling - to derive a functional scaling relationship between conduction time delay and species mass, considering the unmyelinated case where  $\epsilon$  is equal to 0, and the case of 3-dimensional space filling, choosing  $d$  to be 3. The equation for this function is

$$P^* = \sum_{k=0}^N \frac{l_k}{r_k^2 n^k} + \lambda \sum_{k=0}^N \frac{l_k}{r_k^{\frac{1}{2}}} + \lambda_m m_c + \sum_{k=0}^N \lambda_k n^k l_k^3 \quad (\text{S2.1})$$

We begin by setting the derivative of the function with respect to radius equal to zero to solve for the multiplier  $\lambda$ .

$$\frac{\partial P^*}{\partial r_k} = \frac{-2l_k}{r_k^3 n^k} - \frac{\lambda l_k r_k^{-3/2}}{2} = 0 \quad (\text{S2.2})$$

Below, we have the expression for the multiplier

$$\lambda = \frac{-4}{r_k^{3/2} n^k} \quad (\text{S2.3})$$

We can similarly solve for the multiplier  $\lambda_k$  by setting the derivative with respect to length equal to 0.

$$\frac{\partial P^*}{\partial l_k} = \frac{1}{r_k^2 n^k} + \lambda r_k^{-1/2} + 3\lambda_k n^k l_k^2 = 0 \quad (\text{S2.4})$$

Using the expression for  $\lambda$  above, we can solve for an expression for  $\lambda_k$ .

$$\lambda_k = \frac{1}{r_k^2 n^{2k} l_k^2} \quad (\text{S2.5})$$

If we plug this expression for  $\lambda_k$  back into the original expression for  $P^*$ , we get

$$P^* = \sum_{k=0}^N \frac{l_k}{r_k^2 n^k} + \lambda \sum_{k=0}^N \frac{l_k}{r_k^{1/2}} + \lambda_m m_c + \sum_{k=0}^N \left( \frac{1}{r_k^2 n^{2k} l_k^2} \right) n^k l_k^3 \quad (\text{S2.6})$$

The last term simplifies to a term that is identical in form to the power term. So we can rewrite this as

$$P^* = 2 \sum_{k=0}^N \frac{l_k}{r_k^2 n^k} + \lambda \sum_{k=0}^N \frac{l_k}{r_k^{1/2}} + \lambda_m m_c \quad (\text{S2.7})$$

For simplicity, if we denote the power expression as  $P$ , the time delay expression as  $T$ , we can rewrite this as

$$P^* = 2P + \lambda T + \lambda_m m_c \quad (\text{S2.8})$$

Previous results have shown a proportional relationship between  $m_c$ , the mass of a single neuron, and the fourth root of an animal's body mass,  $M^{1/4}$  [Savage et al, 2007]. Thus, we can replace this term and consider a new Lagrange multiplier with the absorbed constant

$$P^* = 2P + \lambda T + \lambda_M M^{1/4} \quad (\text{S2.9})$$

We will now take the derivative of this term with respect to  $M$ , the mass of the species, and set it equal 0.

$$\frac{\partial P^*}{\partial M} = 2 \frac{\partial P}{\partial M} + \lambda \frac{\partial T}{\partial M} + \lambda_M \frac{\partial M^{1/4}}{\partial M} = 0 \quad (\text{S2.10})$$

Previous results have shown that the energetic cost, which we have interpreted here as power loss due to dissipation, decreases with increasing body weight of animals at a linear rate [Wang et al., 2008]. Thus, we can express  $\frac{\partial P}{\partial M}$  generally as a negative constant,  $-C$ . We can rewrite the above expression as

$$\frac{\partial T}{\partial M} = \frac{-\lambda_M M^{-3/4}}{4\lambda} + 2 \frac{C}{\lambda} \quad (\text{S2.11})$$

Solving this differential equation, we have

$$T = \frac{-\lambda_M}{\lambda} M^{1/4} + \frac{2C}{\lambda} M + C_0 \quad (\text{S2.12})$$

If we apply the initial condition  $T=0$  for  $M=0$ , we get  $C_0 = 0$ . Thus, we obtain the following expression relating conduction time delay and body mass

$$T = \frac{-\lambda_M}{\lambda} M^{1/4} + \frac{2C}{\lambda} M \quad (\text{S2.13})$$

## Text S3. Allometric Scaling Relationship Regression Analysis

Our calculations have led to the following allometric relationship between conduction time delay and species mass

$$T = \frac{-\lambda_M}{\lambda} M^{1/4} + \frac{2C}{\lambda} M \quad (\text{S3.1})$$

Note that the function for conduction time delay is a linear combination of two terms. The first term depends on the  $\frac{1}{4}$ -power of the body mass and the second term depends linearly on the body mass.

In order to test the fit of this model to the data, we will run a regression analysis on the following linear model

$$T = \beta_0 + \beta_1 M + \beta_2 M^{1/4} \quad (\text{S3.2})$$

**Table C.1. Regression Coefficients**

|             | Estimate | Standard Error | t value | Pr(>  t ) |
|-------------|----------|----------------|---------|-----------|
| (Intercept) | -4.79    | 3.20           | -1.50   | 0.172     |
| $M$         | 0.00132  | 0.00326        | 0.408   | 0.694     |
| $M^{1/4}$   | 9.40     | 1.66           | 5.66    | 0.000478  |

Estimated coefficients for each term in a linear model fitting conduction time delay to  $M$  and  $M^{1/4}$  shows the relative weight of each of the terms in the model as well as the likelihood that the relationship between the term and conduction time delay is purely by chance. The notation  $\text{Pr}(> |t|)$  represents the p-values, or the probability that the correlation observed is due to random variation.

Here,  $\beta_0$ ,  $\beta_1$ , and  $\beta_2$  are the estimated coefficients. This will allow us to estimate the magnitude of each of these coefficients and the relative importance of each term in determining the conduction time, based on data.

Below is a summary of the results

These results suggest that the  $M^{1/4}$  term dominates in terms of magnitude, as its coefficient, 9.40, is higher than the coefficient for the linear mass ( $M$ ) term that is 0.00132. Moreover, the  $\text{Pr}(> |t|)$  or p-values suggest that the  $M^{1/4}$  term is the only term that is not likely to be due to random chance.

## Text S4. Overview of Reconstruction Data Sources

**Table 1. NeuroMorpho.Org Reconstruction Data: Golgi cells**

| Cell Type   | Region     | Species                       | Archive Name | File Name                  |
|-------------|------------|-------------------------------|--------------|----------------------------|
| Golgi cells | Cerebellum | <i>Giraffa</i>                | Jacobs       | 185-4-4dw                  |
| Golgi cells | Cerebellum | <i>Giraffa</i>                | Jacobs       | 186-4-7dw                  |
| Golgi cells | Cerebellum | <i>Giraffa</i>                | Jacobs       | 187-4-1dw                  |
| Golgi cells | Cerebellum | <i>Homo Sapiens</i>           | Jacobs       | 189-1-21dw                 |
| Golgi cells | Cerebellum | <i>Homo Sapiens</i>           | Jacobs       | 189-1-25dw                 |
| Golgi cells | Cerebellum | <i>Homo Sapiens</i>           | Jacobs       | 189-1-29dw                 |
| Golgi cells | Cerebellum | <i>Loxodonta africana</i>     | Jacobs       | 155-1-2Gol                 |
| Golgi cells | Cerebellum | <i>Loxodonta africana</i>     | Jacobs       | 155-2-6Gol                 |
| Golgi cells | Cerebellum | <i>Loxodonta africana</i>     | Jacobs       | 155-4-5Gol                 |
| Golgi cells | Cerebellum | <i>Megaptera novaeangliae</i> | Jacobs       | 202-2-18nj                 |
| Golgi cells | Cerebellum | <i>Megaptera novaeangliae</i> | Jacobs       | 202-2-21nj                 |
| Golgi cells | Cerebellum | <i>Megaptera novaeangliae</i> | Jacobs       | 202-2-44nj                 |
| Golgi cells | Cerebellum | <i>Neofelis nebulosa</i>      | Jacobs       | 195-4-8nj                  |
| Golgi cells | Cerebellum | <i>Pan troglodytes</i>        | Jacobs       | 205-2-16nj                 |
| Golgi cells | Cerebellum | <i>Pan troglodytes</i>        | Jacobs       | 205-2-21nj                 |
| Golgi cells | Cerebellum | <i>Pan troglodytes</i>        | Jacobs       | 205-2-31nj                 |
| Golgi cells | Cerebellum | <i>Panthera tigris</i>        | Jacobs       | 194-4-19nj                 |
| Golgi cells | Cerebellum | <i>Panthera tigris</i>        | Jacobs       | 194-4-22nj                 |
| Golgi cells | Cerebellum | <i>Panthera tigris</i>        | Jacobs       | 194-4-4nj                  |
| Golgi cells | Cerebellum | <i>Mus musculus</i>           | Vervaeke     | 210710C0                   |
| Golgi cells | Cerebellum | <i>Mus musculus</i>           | Vervaeke     | 240710C0                   |
| Golgi cells | Cerebellum | <i>Mus musculus</i>           | Vervaeke     | Golgi-cell-051108-C0-cell1 |

A table detailing the identity and sources of the Golgi cell reconstruction data extracted from the online database NeuroMorpho.Org. The standardized Morphology Files were used and manipulated based on the methods described in the main text in order to extract the radius and length scaling ratio distributions.

**Table 2. NeuroMorpho.Org Reconstruction Data: Purkinje cells**

| Cell Type      | Region     | Species                | Archive Name | File Name               |
|----------------|------------|------------------------|--------------|-------------------------|
| Purkinje cells | Cerebellum | <i>Cavia porcellus</i> | Dendritica   | v_e_purk1               |
| Purkinje cells | Cerebellum | <i>Cavia porcellus</i> | Dendritica   | v_e_purk2               |
| Purkinje cells | Cerebellum | <i>Cavia porcellus</i> | Dendritica   | v_e_purk3               |
| Purkinje cells | Cerebellum | <i>Mus musculus</i>    | Hess         | 180524_E4_KO            |
| Purkinje cells | Cerebellum | <i>Mus musculus</i>    | Dusart       | Purkinje-slice-ageP35-1 |
| Purkinje cells | Cerebellum | <i>Mus musculus</i>    | DeMunter     | SDM_Purkinje_WT3        |
| Purkinje cells | Cerebellum | <i>Mus musculus</i>    | Martone      | e1cb4a5                 |
| Purkinje cells | Cerebellum | <i>Rattus</i>          | Buffo        | 1-2-2_18                |
| Purkinje cells | Cerebellum | <i>Rattus</i>          | Buffo        | 1-2-8_6                 |
| Purkinje cells | Cerebellum | <i>Rattus</i>          | Martone      | alxP                    |
| Purkinje cells | Cerebellum | <i>Rattus</i>          | Dendritica   | p19                     |
| Purkinje cells | Cerebellum | <i>Rattus</i>          | Dendritica   | p20                     |

A table detailing the identity and sources of the Purkinje cell reconstruction data extracted from the online database NeuroMorpho.Org. The standardized morphology files were used and manipulated based on the methods described in the main text in order to extract the radius and length scaling ratio distributions.

**Table 3. NeuroMorpho.Org Reconstruction Data: Motoneurons**

| Cell Type   | Region      | Species                        | Archive Name    | File Name                          |
|-------------|-------------|--------------------------------|-----------------|------------------------------------|
| Motoneurons | Spinal Cord | <i>Danio rerio</i>             | Morsch          | 1_180107_mnx1_mVenus_taken160715   |
| Motoneurons | Spinal Cord | <i>Danio rerio</i>             | Morsch          | 2_180107_mnx1_mKO2CX_taken160808   |
| Motoneurons | Spinal Cord | <i>Danio rerio</i>             | Morrice         | NeuronStudio_VehicleControl_48hpf1 |
| Motoneurons | Optic Lobe  | <i>Drosophila Melanogaster</i> | Shinomiya_FlyEM | 14135943                           |
| Motoneurons | Optic Lobe  | <i>Drosophila Melanogaster</i> | Shinomiya_FlyEM | C3-B_145                           |
| Motoneurons | Optic Lobe  | <i>Drosophila Melanogaster</i> | Shinomiya_FlyEM | 2546551                            |
| Motoneurons | Optic Lobe  | <i>Drosophila Melanogaster</i> | Shinomiya_FlyEM | C3-F_19                            |
| Motoneurons | Optic Lobe  | <i>Drosophila Melanogaster</i> | Shinomiya_FlyEM | 2583823                            |
| Motoneurons | Optic Lobe  | <i>Drosophila Melanogaster</i> | Shinomiya_FlyEM | C3_Home_10                         |
| Motoneurons | Spinal Cord | <i>Felis Catus</i>             | Burke           | v_e_moto1                          |
| Motoneurons | Spinal Cord | <i>Felis Catus</i>             | Burke           | v_e_moto4                          |
| Motoneurons | Spinal Cord | <i>Felis Catus</i>             | Burke           | v_e_moto5                          |
| Motoneurons | Spinal Cord | <i>Mus musculus</i>            | Leroy           | 04-04-MN9                          |
| Motoneurons | Spinal Cord | <i>Mus musculus</i>            | Leroy           | 06-04-MN4                          |
| Motoneurons | Spinal Cord | <i>Mus musculus</i>            | Leroy           | 06-09-MN                           |
| Motoneurons | Spinal Cord | <i>Oryctolagus cuniculus</i>   | Quinian         | KQa11-12-2015-tracing              |
| Motoneurons | Spinal Cord | <i>Oryctolagus cuniculus</i>   | Quinian         | KQa29-3-2016 <sub>3</sub> 60       |
| Motoneurons | Spinal Cord | <i>Oryctolagus cuniculus</i>   | Quinian         | KQa8-4-2016-tracing                |
| Motoneurons | Spinal Cord | <i>Rattus</i>                  | Alvarez         | Alvarez-Control-Cell-2             |
| Motoneurons | Spinal Cord | <i>Rattus</i>                  | Alvarez         | Alvarez-Control-Cell-3             |
| Motoneurons | Spinal Cord | <i>Rattus</i>                  | Alvarez         | Alvarez-Regen-Cell-4               |
| Motoneurons | Spinal Cord | <i>Testudines</i>              | Chmykhova       | 2T-CMOT                            |
| Motoneurons | Spinal Cord | <i>Testudines</i>              | Chmykhova       | 5Tmn1                              |
| Motoneurons | Spinal Cord | <i>Testudines</i>              | Chmykhova       | 5Tmn2                              |

A table detailing the identity and sources of the motoneuron reconstruction data extracted from the online database NeuroMorpho.Org. The standardized morphology files were used and manipulated based on the methods described in the main text in order to extract the radius and length scaling ratio distributions.

**Table 4. NeuroMorpho.Org Reconstruction Data: Axons**

| Cell Type                   | Region             | Species                         | Archive Name | File Name               |
|-----------------------------|--------------------|---------------------------------|--------------|-------------------------|
| Target-Selective Descending | Ventral Nerve Cord | <i>Anisoptera</i>               | Peng         | C150                    |
| Target-Selective Descending | Ventral Nerve Cord | <i>Anisoptera</i>               | Peng         | C168                    |
| Target-Selective Descending | Ventral Nerve Cord | <i>Anisoptera</i>               | Peng         | C201                    |
| Columnar                    | Optic Lobe         | <i>Brachyura</i>                | Bengochea    | Me-LoP_columnar_Type1.3 |
| Columnar                    | Optic Lobe         | <i>Brachyura</i>                | Bengochea    | Me-LoP_columnar_Type1.5 |
| Columnar                    | Optic Lobe         | <i>Brachyura</i>                | Bengochea    | Me-LoP_columnar_Type2.3 |
| Uniglomerular projection    | Antennal lobe      | <i>Drosophila melanogaster</i>  | Jefferis     | 12070404c1              |
| Uniglomerular projection    | Antennal lobe      | <i>Drosophila melanogaster</i>  | Jefferis     | CT12T2                  |
| Uniglomerular projection    | Antennal lobe      | <i>Drosophila melanogaster</i>  | Jefferis     | LHC6R                   |
| Shepherd's crook neuron     | Mesencephalon      | <i>Gallus gallus domesticus</i> | Marin        | IMc                     |
| Shepherd's crook neuron     | Mesencephalon      | <i>Gallus gallus domesticus</i> | Marin        | IPc                     |
| Shepherd's crook neuron     | Mesencephalon      | <i>Gallus gallus domesticus</i> | Marin        | ShCr_Soma               |
| Undefined                   | Neocortex          | <i>Rattus</i>                   | Almeida      | cm-ctx-e                |
| Undefined                   | Neocortex          | <i>Rattus</i>                   | Almeida      | cm-ctx-f                |
| Undefined                   | Neocortex          | <i>Rattus</i>                   | Almeida      | ctr-ctx-3-b             |

A table detailing the identity and sources of the axon reconstruction data extracted from the online database NeuroMorpho.Org. The standardized morphology files were used and manipulated based on the methods described in the main text in order to extract the radius and length scaling ratio distributions.

**Table 5. NeuroMorpho.Org Reconstruction Data: Peripheral Nervous System Neurons**

| Cell Type              | Region                    | Species                        | Archive Name | File Name                 |
|------------------------|---------------------------|--------------------------------|--------------|---------------------------|
| Dendritic arborization | Peripheral Nervous System | <i>Drosophila melanogaster</i> | Ye           | 021804-2b_ddaC-3-cd8_ch00 |
| Dendritic arborization | Peripheral Nervous System | <i>Drosophila melanogaster</i> | Ascoli,Cox   | 11CL-IVxAnk2IR_ddaC       |
| Dendritic arborization | Peripheral Nervous System | <i>Drosophila melanogaster</i> | Bellemer     | 36775-3                   |
| Sensory                | Peripheral Nervous System | <i>Mus musculus</i>            | Canavesi     | control-contact-2         |
| Sensory                | Peripheral Nervous System | <i>Mus musculus</i>            | Canavesi     | control-noncontact-1      |
| Sensory                | Peripheral Nervous System | <i>Mus musculus</i>            | Canavesi     | diabetic-contact-4        |
| Sensory                | Peripheral Nervous System | <i>Mus musculus</i>            | Yorek        | image002                  |
| Sensory                | Peripheral Nervous System | <i>Mus musculus</i>            | Yorek        | image008                  |
| Sensory                | Peripheral Nervous System | <i>Mus musculus</i>            | Yorek        | image025_1                |
| Somatic                | Peripheral Nervous System | <i>Mus musculus</i>            | Badea        | Badea2012Fig6A-C-R        |
| Somatic                | Peripheral Nervous System | <i>Mus musculus</i>            | Badea        | Badea2012Fig6B            |
| Somatic                | Peripheral Nervous System | <i>Mus musculus</i>            | Badea        | Badea2012Fig6E-I-R        |
| Touch receptor         | Peripheral Nervous System | <i>Mus musculus</i>            | Lumpkin      | 01-09-TD4                 |
| Touch receptor         | Peripheral Nervous System | <i>Mus musculus</i>            | Lumpkin      | 1-09-TD1-v3               |
| Touch receptor         | Peripheral Nervous System | <i>Mus musculus</i>            | Lumpkin      | 1-09-TD4-v2               |

A table detailing the identity and sources of the Peripheral Nervous System neuron reconstruction data extracted from the online database NeuroMorpho.Org. The standardized morphology files were used and manipulated based on the methods described in the main text in order to extract the radius and length scaling ratio distributions.
